# Supplementary material for: FOXP3 promotes tumor growth and metastasis by activating Wnt/β-catenin signaling pathway and EMT in non-small cell lung cancer
Source: PubMed Central journal article supplement (PMC5514503; doi:10.1186/s12943-017-0700-1), 2017-07-17
Supplement: 12943_2017_700_MOESM1_ESM.pdf [file 12943_2017_700_MOESM1_ESM.pdf]

**Table S1. Clinical characteristics of NSCLC patients**

| Characteristics                 | number    | %  |
|---------------------------------|-----------|----|
| All                             | 106       |    |
| Age                             | 66.7±11.6 |    |
| Gender                          |           |    |
| Male                            | 75        | 71 |
| Female                          | 31        | 29 |
| Smoking status                  |           |    |
| smoker                          | 55        | 52 |
| non-smoker                      | 51        | 48 |
| Histology                       |           |    |
| squamous cell carcinoma         | 27        | 25 |
| adenocarcinoma                  | 64        | 60 |
| large cell carcinoma            | 5         | 5  |
| poorly differentiated carcinoma | 10        | 9  |
| Tumor size                      |           |    |
| ≤50mm                           | 73        | 69 |
| 50mm>                           | 33        | 31 |
| Number of tumor                 |           |    |
| single                          | 93        | 88 |
| multi-tumor                     | 13        | 12 |
| Histology grade                 |           | 0  |
| well and moderate               | 71        | 67 |
| poor                            | 35        | 33 |
| vascular invasion               |           | 0  |
| yes                             | 9         | 8  |
| no                              | 97        | 92 |
| pulmonary tuberculosis          |           |    |
| yes                             | 3         | 3  |
| no                              | 103       | 97 |
| Pathology stage                 | 0         |    |
| I-II                            | 79        | 75 |
| III-IV                          | 27        | 25 |
| Nodal status                    |           |    |
| p-N(0)                          | 59        | 56 |
| p-N(1)-p-N(2)                   | 47        | 44 |

**Table S2. DNA sequences of real-time PCR primers used for the detection of mRNA expression.**

| <b>primer name</b> | <b>Sequence (5'-3')</b> |
|--------------------|-------------------------|
| ACTB Fwd           | AGGCACCAGGGCGTGAT       |
| ACTB Rev           | GGGTGAGGATGCCTCTCTTG    |
| AXIN-2 Fwd         | CTTTCGCCAACCGTGGTT      |
| AXIN-2 Rev         | GGATCGCTCCTCTTGAAGGA    |
| beta-catenin Fwd   | TCCTGAGGAAGAGGATGTGGAT  |
| beta-catenin Rev   | CCTCTGAGCTCGAGTCATTGC   |
| Claudin-1 Fwd      | GAGCAGCACATTGCAAGCAA    |
| Claudin-1 Rev      | TCGTCTTCCAAGCACTTCATACA |
| c-myc Fwd          | GAGCCCCTGGTGCTCCAT      |
| c-myc Rev          | GCCTGCCTCTTTTCCACAGA    |
| Cyclin D1 Fwd      | CTGGAGGTCTGCGAGGAACA    |
| Cyclin D1 Rev      | AGCTGCAGGCGGCTCTTT      |
| E-Cadherin Fwd     | CTTTGACGCCGAGAGCTACAC   |
| E-Cadherin Rev     | TTGTGACCCGGTGCAATCT     |
| FOXP3 Fwd          | CCTACCCACTGCTGGCAAAT    |
| FOXP3 Rev          | CCTGGCAGTGCTTGAGGAA     |
| GAPDH Fwd          | GCACCACCAACTGCTTAGCA    |
| GAPDH Rev          | TCTTCTGGGTGGCAGTGATG    |
| HER 2 Fwd          | TCACCTACCTGCCACCAAT     |
| HER 2 Rev          | GGGACCTGCCTCACTTGGTT    |
| LEF-1 Fwd          | CCACGACAAGGCCAGAGAAC    |
| LEF-1 Rev          | GGCATCATTATGTACCCGGAAT  |
| MMP2 Fwd           | GTGGGACAAGAACCAGATCACA  |
| MMP2 Rev           | CACATCGCTCCAGACTTGGA    |
| MMP7 Fwd           | CGGGAGGCATGAGTGAGCTA    |
| MMP7 Rev           | TTGGCTTCTAAACTGTTGGCATT |
| MMP9 Fwd           | CGCCAGTCCACCCTTG TG     |
| MMP9 Rev           | TGCCACCCGAGTGTAACCAT    |
| N-Cadherin Fwd     | TTGAGCCTGAAGCCAACCTT    |
| N-Cadherin Rev     | TGTAGGTGGCCACTGTGCTTAC  |
| Slug Fwd           | TCCTGGTCAAGAAGCATTTC AA |
| Slug Rev           | TTGTGGTATGACAGGCATGGA   |
| Snail Fwd          | ATGCCGCGCTCTTTCCT       |
| Snail Rev          | CGTAGGGCTGCTGGAAGGTA    |
| TWIST1 Fwd         | CAGGTACATCGACTTCCTTACCA |
| TWIST1 Rev         | TCCATCCTCCAGACCGAGAA    |
| TWIST2 Fwd         | CCGCCAGGTACATAGACTTCCT  |
| TWIST2 Rev         | CACACGGAGAAGGCGTAGCT    |
| VIM Fwd            | TTGCAGGAGGAGATGCTTCA    |
| VIM Rev            | GATTCCACTTTGCGTTCAAGGT  |
| ZEB1 Fwd           | GAAAGGAAGGGCAAGAAATCCT  |
| ZEB1 Rev           | TCTGCATCTGACTCGCATTCA   |
| ZEB2 Fwd           | GTGCAAGAGGCGCAAACAA     |
| ZEB2 Rev           | CCGTCATCCTCAGCAATATGAA  |

**Table S3. Clinical characteristics and distribution of patients according to their FOXP3 expression levels.**

| Characteristics                 | Tumor FOXP3 expression |            |          |        |
|---------------------------------|------------------------|------------|----------|--------|
|                                 | low level              | high level | $\chi^2$ | p      |
| All                             | 65                     | 41         |          |        |
| Age                             | 66.4±8.4               | 67.2±11.4  | t=0.3918 | 0.696  |
| Gender                          |                        |            |          |        |
| Male                            | 46                     | 29         | 0        | 0.997  |
| Female                          | 19                     | 12         |          |        |
| Smoking status                  |                        |            | 0.824    | 0.364  |
| smoker                          | 36                     | 19         |          |        |
| non-smoker                      | 29                     | 22         |          |        |
| Histology                       |                        |            | 1.31     | 0.73   |
| squamous cell carcinoma         | 17                     | 10         |          |        |
| adenocarcinoma                  | 39                     | 25         |          |        |
| large cell carcinoma            | 2                      | 3          |          |        |
| poorly differentiated carcinoma | 7                      | 3          |          |        |
| Tumor size                      |                        |            |          |        |
| ≤50mm                           | 45                     | 28         | 0.01     | 0.919  |
| 50mm>                           | 20                     | 13         |          |        |
| Number of tumor                 |                        |            |          |        |
| single                          | 58                     | 35         | 0.35     | 0.555  |
| multi-tumor                     | 7                      | 6          |          |        |
| Histology grade                 |                        |            | 0.052    | 0.82   |
| well and moderate               | 43                     | 28         |          |        |
| poor                            | 22                     | 13         |          |        |
| vascular invasion               |                        |            | 1.12     | 0.289  |
| yes                             | 7                      | 2          |          |        |
| no                              | 58                     | 39         |          |        |
| pulmonary tuberculosis          |                        |            | 0.037    | 0.847  |
| yes                             | 2                      | 1          |          |        |
| no                              | 63                     | 40         |          |        |
| Pathology stage                 |                        |            | 1.369    | 0.242  |
| I-II                            | 51                     | 28         |          |        |
| III-IV                          | 14                     | 13         |          |        |
| Nodal status                    |                        |            | 0.109    | 0.742  |
| p-N(0)                          | 37                     | 22         |          |        |
| p-N(1)-p-N(2)                   | 28                     | 19         |          |        |
| Treg cell counts                |                        |            |          |        |
| >25                             | 19                     | 24         | 8.95     | 0.003* |
| ≤25                             | 46                     | 17         |          |        |

**Table S4. Cox proportional Hazard regression analysis of patients' overall survival.**

| Variables                                       | Univariable |          |       |       | Multivariable |          |       |       |
|-------------------------------------------------|-------------|----------|-------|-------|---------------|----------|-------|-------|
|                                                 | HR          | 95.0% CI |       | P     | HR            | 95.0% CI |       | P     |
|                                                 |             | lower    | upper |       |               | lower    | upper |       |
| Age                                             | 1.00        | 0.98     | 1.03  | 0.76  | 1.01          | 0.99     | 1.04  | 0.28  |
| Gender<br>(male vs female)                      | 1.22        | 0.75     | 2.01  | 0.42  | 1.06          | 0.59     | 1.92  | 0.84  |
| Smoking status<br>(smoker vs nonsmoker)         | 1.10        | 0.71     | 1.72  | 0.67  | 0.88          | 0.52     | 1.48  | 0.63  |
| Histology grade<br>(poor vs well and moderate ) | 1.62        | 1.02     | 2.57  | 0.04* | 2.10          | 1.29     | 3.41  | 0.00* |
| Tumor size<br>(>50mm vs ≤50mm)                  | 1.03        | 0.63     | 1.68  | 0.90  | 1.07          | 0.61     | 1.86  | 0.82  |
| Pathology stage<br>(III+IV vs I+II)             | 2.75        | 1.67     | 4.53  | 0.00* | 1.91          | 0.92     | 3.96  | 0.08* |
| Tumor number<br>(multi number vs single)        | 1.37        | 0.71     | 2.67  | 0.35  | 0.63          | 0.27     | 1.48  | 0.29  |
| Vascular invasion<br>(yes vs no)                | 1.21        | 0.56     | 2.64  | 0.63  | 1.10          | 0.46     | 2.66  | 0.83  |
| Pathology TB<br>( yes vs no)                    | 2.96        | 0.91     | 9.60  | 0.07* | 3.23          | 0.88     | 11.90 | 0.07* |
| Nodal status<br>(pN(1)+pN(2) vs pN(0))          | 3.04        | 1.92     | 4.81  | 0.00* | 2.96          | 1.68     | 5.18  | 0.00* |
| Treg cell counts<br>>25 vs ≤25                  | 1.05        | 0.67     | 1.65  | 0.84  | 0.95          | 0.57     | 1.61  | 0.86  |
| FOXP3 expression<br>(High vs Low)               | 1.86        | 1.18     | 2.92  | 0.01* | 2.09          | 1.27     | 3.44  | 0.00* |

**Table S5. Cox proportional Hazard regression analysis of patients' recurrence-free survival.**

| Variables                                          | Univariable |          |       |       | Multivariable |          |       |       |
|----------------------------------------------------|-------------|----------|-------|-------|---------------|----------|-------|-------|
|                                                    | HR          | 95.0% CI |       | P     | HR            | 95.0% CI |       | P     |
|                                                    |             | lower    | upper |       |               | lower    | upper |       |
| Age                                                | 1.00        | 0.97     | 1.02  | 0.71  | 1.00          | 0.98     | 1.03  | 0.85  |
| Gender<br>(male vs female)                         | 1.23        | 0.75     | 2.02  | 0.40  | 1.09          | 0.60     | 1.96  | 0.78  |
| Smoking status<br>(smoker vs<br>nonsmoker)         | 1.11        | 0.71     | 1.73  | 0.64  | 0.84          | 0.50     | 1.42  | 0.52  |
| Histology grade<br>(poor vs well and<br>moderate ) | 1.70        | 1.07     | 2.69  | 0.02* | 1.97          | 1.20     | 3.24  | 0.01* |
| Tumor size<br>(>50mm vs ≤50mm)                     | 1.14        | 0.70     | 1.86  | 0.60  | 1.05          | 0.60     | 1.82  | 0.87  |
| Pathology stage<br>(III+IV vs I+II)                | 2.61        | 1.58     | 4.31  | 0.00* | 1.66          | 0.82     | 3.36  | 0.16  |
| Tumor number<br>(multiple vs single)               | 1.61        | 0.83     | 3.15  | 0.16  | 0.73          | 0.31     | 1.69  | 0.47  |
| Vascular invasion<br>(yes vs no)                   | 1.09        | 0.50     | 2.37  | 0.83  | 0.99          | 0.42     | 2.40  | 0.98  |
| Pathology TB<br>( yes vs no)                       | 1.81        | 0.57     | 5.80  | 0.32  | 1.81          | 0.50     | 6.54  | 0.36  |
| Nodal status<br>(pN(1)+pN(2) vs<br>pN(0))          | 2.59        | 1.64     | 4.09  | 0.00* | 2.38          | 1.36     | 4.15  | 0.00* |
| Treg cell counts<br>>25 vs ≤25                     | 0.91        | 0.58     | 1.44  | 0.69  | 0.82          | 0.49     | 1.39  | 0.46  |
| FOXP3 expression<br>(High vs Low)                  | 1.71        | 1.09     | 2.70  | 0.02* | 1.99          | 1.15     | 3.46  | 0.01* |
